# Supplementary material for: An Essential Role for Katanin p80 and Microtubule Severing in Male Gamete Production
Source: PubMed Central journal article supplement (PMC3359970; doi:10.1371/journal.pgen.1002698), 2012-05-24

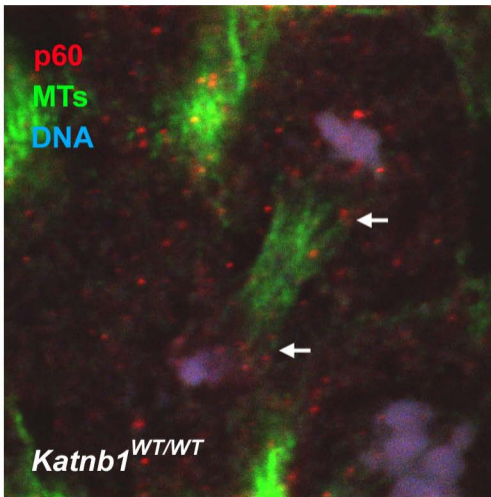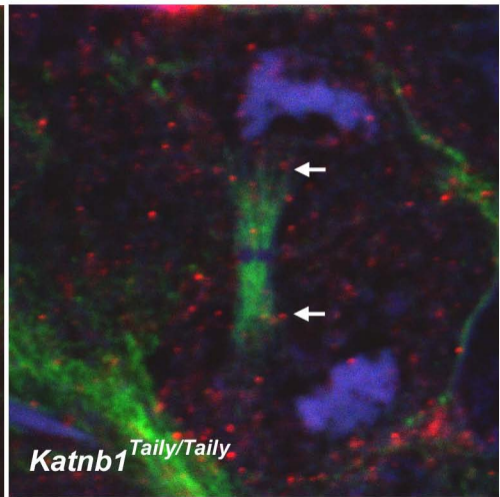

Supplement: pgen.1002698.s003.pdf [file pgen.1002698.s003.pdf]
